# Supplementary material
Source: MDPI journal article supplement (https://www.mdpi.com/2073-4344/12/10/1286)
Supplement: s1 [file s1]

# Spillover Hydrogen on Electron-Rich Ni/m-TiO<sub>2</sub> for Hydrogenation of Furfural to Tetrahydrofurfuryl Alcohol

Ravi Balaga<sup>1,2,3</sup>, Kishore Ramineni<sup>1,2</sup>, Xiaoqiang Zhang<sup>1,2,3</sup>, Peifang Yan<sup>1,2</sup>, Mahender Reddy Marri<sup>1,2</sup>, Vijayanand Perupogu<sup>4</sup> and Zongchao Conrad Zhang<sup>1,2,\*</sup>

<sup>1</sup> State Key Laboratory of Catalysis, Dalian Institute of Chemical Physics, Chinese Academy of Sciences, Dalian 116023, China; ravibalaga@yahoo.com (R.B.); kishorramineni@gmail.com (K.R.); zhangxiaoqiang@dicp.ac.cn (X.Z.); yanpeifang@dicp.ac.cn (P.Y.); marrimahe@yahoo.in (M.R.M.)

<sup>2</sup> Dalian National Laboratory for Clean Energy, Dalian Institute of Chemical Physics, Chinese Academy of Sciences, Dalian 116023, China

<sup>3</sup> University of Chinese Academy of Sciences, Beijing 100049, China

<sup>4</sup> Energy & Environmental Engineering Department CSIR-Indian, Institute of Chemical Technology, Hyderabad, Telangana 500007, India; pvanand@iiict.res.in

\* Correspondence: zczhang@dicp.ac.cn

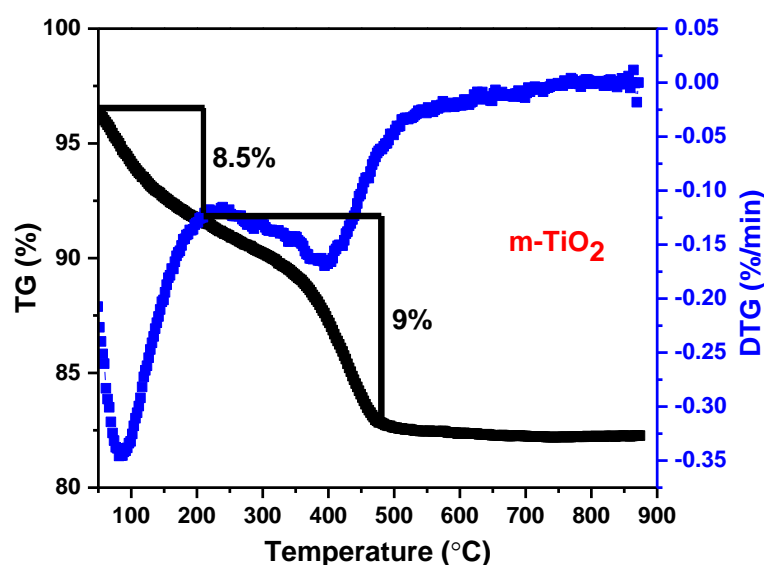

Figure S1. TGA analysis of uncalcined m-TiO<sub>2</sub> catalyst.

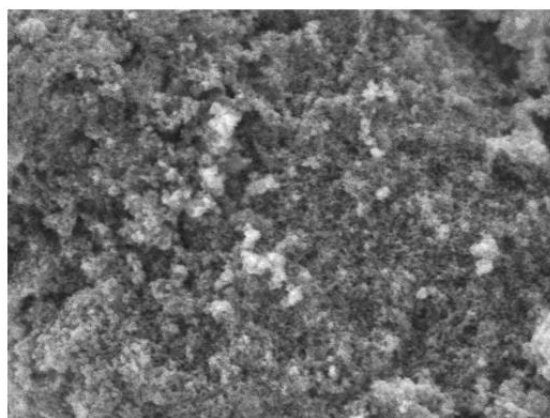

Figure S2. SEM image of pure m-TiO<sub>2</sub>

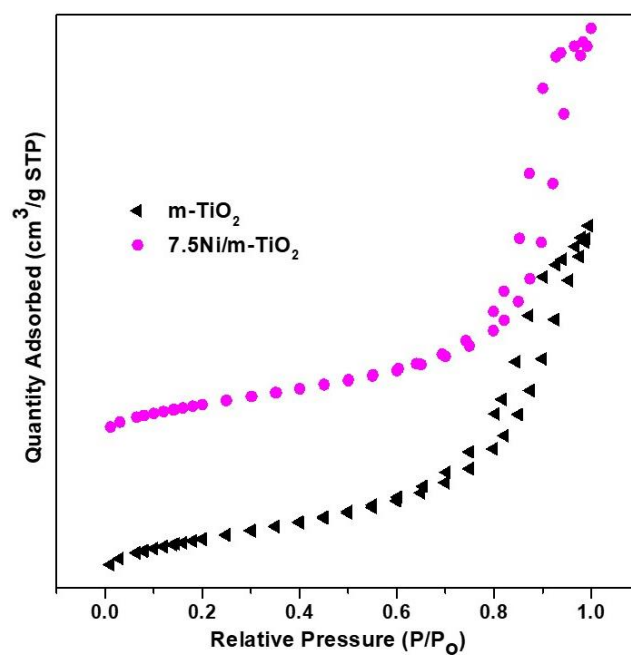

Figure S3. BET of pure m-TiO<sub>2</sub> and 7.5Ni/m-TiO<sub>2</sub>.

Table S1. Physicochemical properties of various catalysts.

| S.No | Catalysts                | BET (m <sup>2</sup> /g) | Pore Volume (cm <sup>3</sup> /g) | Pore Size (nm) |
|------|--------------------------|-------------------------|----------------------------------|----------------|
| 1    | m-TiO <sub>2</sub>       | 275.3                   | 0.71                             | 10.3           |
| 2    | 7.5Ni/m-TiO <sub>2</sub> | 246.0                   | 0.85                             | 13.5           |

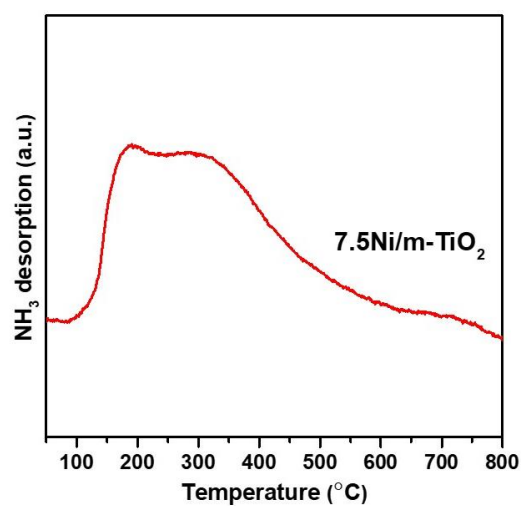

Figure S4. NH<sub>3</sub>-TPD of 7.5Ni/m-TiO<sub>2</sub>.

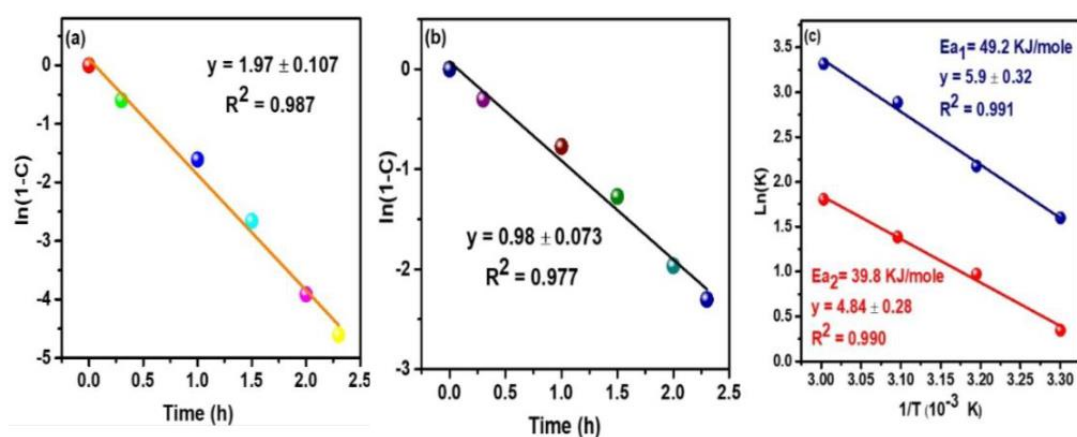

**Figure S5.** First order kinetics fit for (a) hydrogenation of FFA to FOL, (b) hydrogenation of FOL to THFA at various time and  $T = 100$  °C, (c) Arrhenius plot of the activation energy ( $E_{a1}$  FFA hydrogenation,  $E_{a2}$  for FOL hydrogenation) at  $T = 30$ – $60$  °C, substrate = 1 mmol, water = 2 mL, catalyst = 0.03 g,  $p = 2$  MPa  $H_2$ , time = 1 h.

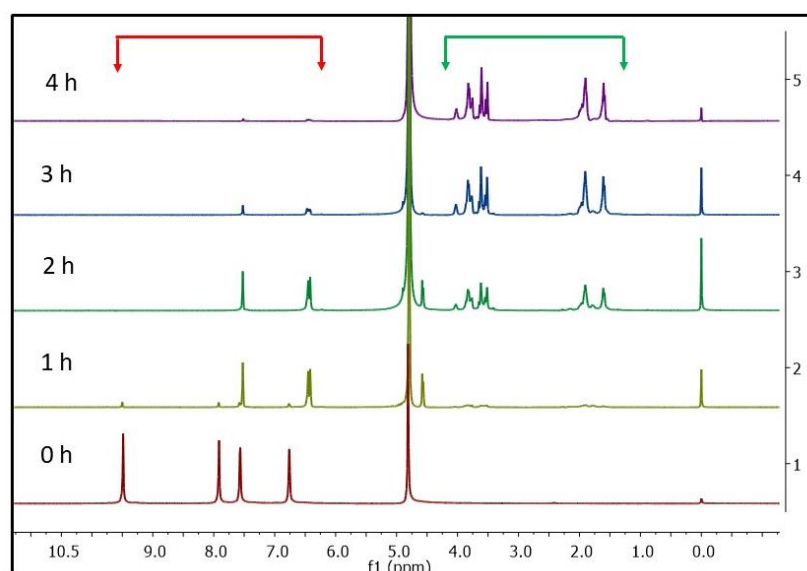

**Figure S6.**  $^1H$  NMR of conversion of FFA to THFA in isotopic  $D_2O$ . The red arrows show the consumption of FFA and FOL, and the green one leads the formation of THFA.

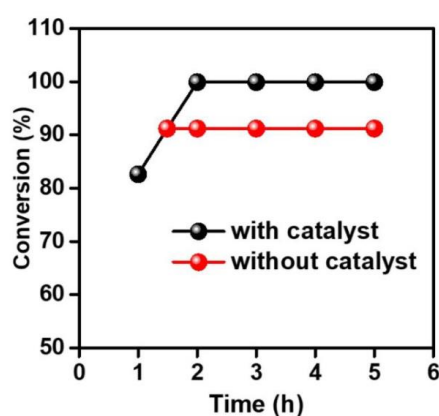

**Figure S7.** Leaching test for FFA hydrogenation with catalyst (black color), without catalyst (red color).

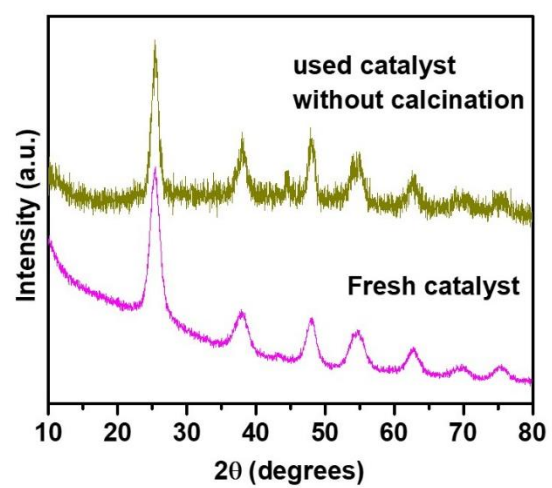

Figure S8. XRD of spent 7.5Ni/mTiO<sub>2</sub> catalyst.
